# Supplementary material for: Factors of Anti-Vascular Endothelial Growth Factor Therapy Withdrawal in Patients with Neovascular Age-Related Macular Degeneration: Implications for Improving Patient Adherence
Source: MDPI journal article supplement (doi:10.3390/jcm10143106), 2021-07-14
Supplement: s1 [file s1]

# Supplementary materials

## Supplemental Methods

All data, including diagnoses and treatments, were self-reported and could not be verified by cross-checks with medical records. In terms of the anticipated sample size for this survey, we estimated that 180–240 patients would complete this exploratory survey for Cohort 1 and 100 for Cohort 2. No power analysis or sample size calculation was done.

The main questionnaire (**Supplemental Tables 2 and 3**) was assessed and validated internally via face-to-face interviews with six nAMD patients individually (four who had discontinued anti-VEGF therapy and two continuing anti-VEGF therapy). Following these interviews, the pre-defined reasons were modified in terms of the clarity of the wording, avoiding duplicated meanings, and inclusion of the most expected reasons.-

All respondents were also asked to complete validated Japanese versions of the EQ-5D-5L to assess health-related quality of life and the PAM-13 to measure patient activation levels [1]. The PAM-13 is a 13-item questionnaire designed to assess the patient's knowledge, skill, and confidence with self-managing their health or disease [2-4]. Each item comprises four possible responses (disagree strongly/disagree/agree/agree strongly/not applicable), which are converted to a scale of 0–100, where higher levels indicate more proactive attitudes towards managing own health.

## References

1. Herdman, M.; Gudex, C.; Lloyd, A.; Janssen, M.; Kind, P.; Parkin, D.; Bonnel, G.; Badia, X. Development and preliminary testing of the new five-level version of EQ-5D (EQ-5D-5L). *Qual Life Res* **2011**, *20*, 1727-1736, doi:10.1007/s11136-011-9903-x.
2. Fujita, E.; Kuno, E.; Kato, D.; Kokochi, M.; Uehara, K. Development and validation of the Japanese version of the Patient Activation Measure 13 for Mental Health. *Seishin Igaku* **2010**, *52*, 765-772 (in Japanese).
3. Hibbard, J.H.; Mahoney, E.R.; Stockard, J.; Tusler, M. Development and testing of a short form of the patient activation measure. *Health Serv Res* **2005**, *40*, 1918-1930, doi:10.1111/j.1475-6773.2005.00438.x.
4. Hibbard, J.H.; Stockard, J.; Mahoney, E.R.; Tusler, M. Development of the Patient Activation Measure (PAM): conceptualizing and measuring activation in patients and consumers. *Health Serv Res* **2004**, *39*, 1005-1026, doi:10.1111/j.1475-6773.2004.00269.x.

**Table S1.** Patient questionnaire.

| <b>Questions</b>                                                                                    | <b>Responses</b>                                                                                                                                                                                                                                                               |
|-----------------------------------------------------------------------------------------------------|--------------------------------------------------------------------------------------------------------------------------------------------------------------------------------------------------------------------------------------------------------------------------------|
| <b>Screening questions</b>                                                                          |                                                                                                                                                                                                                                                                                |
| Have you been diagnosed with age-related macular degeneration (AMD) by a physician?                 | <ul style="list-style-type: none"> <li>• Yes</li> <li>• No</li> <li>• Not sure</li> </ul>                                                                                                                                                                                      |
| Have you received anti-VEGF therapy to treat your AMD?                                              | <ul style="list-style-type: none"> <li>• Yes</li> <li>• No</li> <li>• Not sure</li> </ul>                                                                                                                                                                                      |
| Has it been 6 months or longer since you last received anti-VEGF therapy?                           | <ul style="list-style-type: none"> <li>• Yes (Cohort 1)</li> <li>• No (Cohort 2)</li> </ul>                                                                                                                                                                                    |
| If Cohort 1:<br>Was it your doctor's decision to not have anti-VEGF therapy in the last few months? | <ul style="list-style-type: none"> <li>• Yes (Cohort 1-1)</li> <li>• No (Cohort 1-2)</li> </ul>                                                                                                                                                                                |
| If Cohort 1-1:<br>How would you describe your current situation regarding anti-VEGF therapy?        | <ul style="list-style-type: none"> <li>• I completed treatment</li> <li>• I am still continuing follow-up visits</li> </ul>                                                                                                                                                    |
| Sex                                                                                                 | <ul style="list-style-type: none"> <li>• Male</li> <li>• Female</li> </ul>                                                                                                                                                                                                     |
| Age                                                                                                 | <ul style="list-style-type: none"> <li>• &lt;50 years</li> <li>• 50–59 years</li> <li>• 60–69 years</li> <li>• 70–79 years</li> <li>• ≥80 years</li> </ul>                                                                                                                     |
| Place of residence                                                                                  | <ul style="list-style-type: none"> <li>• Japan scale</li> </ul>                                                                                                                                                                                                                |
| <b>General questions</b>                                                                            |                                                                                                                                                                                                                                                                                |
| Are you living with family?                                                                         | <ul style="list-style-type: none"> <li>• Yes</li> <li>• No</li> </ul>                                                                                                                                                                                                          |
| Who are they?                                                                                       | <ul style="list-style-type: none"> <li>• Spouse/partner</li> <li>• Children</li> <li>• Other</li> </ul>                                                                                                                                                                        |
| Are you currently employed?                                                                         | <ul style="list-style-type: none"> <li>• Yes</li> <li>• No</li> </ul>                                                                                                                                                                                                          |
| What is your highest level of education?                                                            | <ul style="list-style-type: none"> <li>• Middle school</li> <li>• High school</li> <li>• Vocational school</li> <li>• Junior college</li> <li>• University</li> <li>• Post-graduate school</li> <li>• Everyday</li> </ul>                                                      |
| How often do you smoke?                                                                             | <ul style="list-style-type: none"> <li>• Sometimes</li> <li>• Used to smoke</li> <li>• Never smoked</li> </ul>                                                                                                                                                                 |
| <b>Comorbidities</b>                                                                                |                                                                                                                                                                                                                                                                                |
| Other than AMD, what illnesses do you have? (multiple choice)                                       | <ul style="list-style-type: none"> <li>• Glaucoma</li> <li>• Cataract</li> <li>• Cerebrovascular disease</li> <li>• Heart disease</li> <li>• Diabetes mellitus</li> <li>• Hypertension</li> <li>• Hyperlipidemia</li> <li>• Cancer</li> <li>• Other</li> <li>• None</li> </ul> |
| <b>Eye-related questions</b>                                                                        |                                                                                                                                                                                                                                                                                |

Regarding your eye condition, what do you find difficult in daily life?  
(multiple choice)

- To recognize people's faces or objects
- To read books or newspapers
- To drive
- To go out alone
- Other
- No particular difficulties
- 0.01–0.1
- 0.2–0.3
- 0.4–0.6
- 0.7–1.0
- $\geq 1.2$
- Not sure

What is your current visual acuity?

### Diagnosis-related questions

When were you diagnosed with AMD?

- Within 1 year
- Within 3 years
- Within 5 years
- Within 10 years
- $\geq 10$  years
- One eye
- Both eyes
- Good
- Quite good
- Not quite good
- Not good at all

Do you have AMD in one eye or both eyes?

What was your level of understanding of AMD at the beginning of your diagnosis/treatment?

### Anti-VEGF therapy related questions

Type of hospital

- Eye clinic (primary care)
- Eye hospital with referral
- Eye hospital without referral (personal choice of secondary care)

Time to get to hospital

- $< 30$  minutes
- $\geq 30$  minutes
- $\geq 1$  hour
- $\geq 1.5$  hours

How did (do) you travel to hospital

- By car
- By taxi
- By public transport (train, bus, etc.)
- By bicycle
- On foot

Did (does) someone accompany you to hospital?

- Yes
- No
- $< 3$  months

How long have you continued anti-VEGF therapy?  
(approximate time from the first to last injection)

- $\geq 3$  months
- $\geq 1$  year
- $\geq 3$  years
- $\geq 5$  years

Frequency of visits

- Every month
- Every 2 months
- Every 3 months
- Every 6 months
- Neither applies

Frequency of injections

- Every month
- Every 2 months
- Every 3 months
- Every 6 months
- Neither applies

|                                                               |                                                                                                                                                              |
|---------------------------------------------------------------|--------------------------------------------------------------------------------------------------------------------------------------------------------------|
| What was the cost per visit when you had (have) an injection? | <ul style="list-style-type: none"> <li>• &lt;10,000 JPY</li> <li>• 10,000–29,999 JPY</li> <li>• 30,000–49,999 JPY</li> <li>• ≥50,000 JPY</li> </ul>          |
| What is your relationship with your doctor?                   | <ul style="list-style-type: none"> <li>• Very good</li> <li>• Good</li> <li>• Neither good nor bad</li> <li>• Not good</li> <li>• Not good at all</li> </ul> |
| What is your current level of understanding of AMD?           | <ul style="list-style-type: none"> <li>• Good</li> <li>• Quite good</li> <li>• Not quite good</li> <li>• Not good at all</li> </ul>                          |

---

AMD, age-related macular degeneration; VEGF, vascular endothelial growth factor.

**Table S2.** Main questionnaire: reasons for discontinuing anti-VEGF therapy in Cohort 1.

| Topic         | <p><b><i>C1-1: Other than the doctor's decision, please specify whether each of the statements below is true in explaining your reason for discontinuing anti-VEGF therapy.</i></b></p> <p><b><i>C1-2: Please specify whether each of the statements below is true in explaining your reason for discontinuing anti-VEGF therapy.</i></b></p>                                                                                   |
|---------------|---------------------------------------------------------------------------------------------------------------------------------------------------------------------------------------------------------------------------------------------------------------------------------------------------------------------------------------------------------------------------------------------------------------------------------|
| Efficacy      | <ul style="list-style-type: none"> <li>• Because the treatment was ineffective</li> </ul>                                                                                                                                                                                                                                                                                                                                       |
| Finance       | <ul style="list-style-type: none"> <li>• Because there was no deterioration in vision</li> </ul>                                                                                                                                                                                                                                                                                                                                |
| Understanding | <ul style="list-style-type: none"> <li>• Because of financial burden</li> </ul>                                                                                                                                                                                                                                                                                                                                                 |
| Visits        | <ul style="list-style-type: none"> <li>• Because I was not sure why I should continue the treatment</li> <li>• Because I had to visit hospital too often</li> <li>• Because transport to hospital was inconvenient</li> <li>• Because treatment was time-consuming including long wait times</li> <li>• <i>If you were in need of a companion</i>, because it was hard to find someone who could take me to hospital</li> </ul> |
| Treatment     | <ul style="list-style-type: none"> <li>• Because treatment required injections too many times</li> <li>• Because it was scary to have an injection in the eye</li> <li>• Because the feeling of the injection was unpleasant</li> <li>• Because I was dissatisfied with the doctor</li> </ul>                                                                                                                                   |
| Etc.          | <ul style="list-style-type: none"> <li>• Because I had another disease I had to prioritize over AMD</li> <li>• Because I was concerned about side effects</li> </ul>                                                                                                                                                                                                                                                            |

---

All reasons were presented in a random order, and had four possible responses: definitely true, mostly true, mostly false, definitely false. AMD, age-related macular degeneration; VEGF, vascular endothelial growth factor.

**Table S4.** Reasons for treatment discontinuation in Cohort 1.

|                                                                                                      | <b>Cohort 1-1</b> (discontinued due to doctor's decision) ( <i>n</i> = 185) |                 |             |              |                  | <b>Cohort 1-2</b> (discontinued due to their own decision) ( <i>n</i> = 22) |                 |             |              |                  |
|------------------------------------------------------------------------------------------------------|-----------------------------------------------------------------------------|-----------------|-------------|--------------|------------------|-----------------------------------------------------------------------------|-----------------|-------------|--------------|------------------|
|                                                                                                      | <b>True</b><br>(= Definitely true + Mostly true)                            | Definitely true | Mostly true | Mostly false | Definitely false | <b>True</b><br>(= Definitely true + Mostly true)                            | Definitely true | Mostly true | Mostly false | Definitely false |
| There was no deterioration in vision                                                                 | <b>65 (35.1)</b>                                                            | 36 (19.5)       | 29 (15.7)   | 26 (14.1)    | 94 (50.8)        | <b>15 (68.2)</b>                                                            | 7 (31.8)        | 8 (36.4)    | 3 (13.6)     | 4 (18.2)         |
| The treatment was ineffective                                                                        | <b>36 (19.5)</b>                                                            | 10 (5.4)        | 26 (14.1)   | 34 (18.4)    | 115 (62.2)       | <b>10 (45.5)</b>                                                            | 7 (31.8)        | 3 (13.6)    | 5 (22.7)     | 7 (31.8)         |
| Financial burden                                                                                     | <b>24 (13.0)</b>                                                            | 3 (1.6)         | 21 (11.4)   | 33 (17.8)    | 128 (69.2)       | <b>12 (54.5)</b>                                                            | 6 (27.3)        | 6 (27.3)    | 2 (9.1)      | 8 (36.4)         |
| It was scary to have an injection in the eye                                                         | <b>21 (11.4)</b>                                                            | 4 (2.2)         | 17 (9.2)    | 34 (18.4)    | 130 (70.3)       | <b>8 (36.4)</b>                                                             | 4 (18.2)        | 4 (18.2)    | 4 (18.2)     | 10 (45.5)        |
| Treatment was time-consuming including long waiting times                                            | <b>20 (10.8)</b>                                                            | 4 (2.2)         | 16 (8.6)    | 33 (17.8)    | 132 (71.4)       | <b>9 (40.9)</b>                                                             | 2 (9.1)         | 7 (31.8)    | 7 (31.8)     | 6 (27.3)         |
| The feeling of the injection was unpleasant                                                          | <b>18 (9.7)</b>                                                             | 6 (3.2)         | 12 (6.5)    | 31 (16.8)    | 136 (73.5)       | <b>5 (22.7)</b>                                                             | 2 (9.1)         | 3 (13.6)    | 5 (22.7)     | 12 (54.5)        |
| I was not sure why I should continue the treatment                                                   | <b>16 (8.6)</b>                                                             | 5 (2.7)         | 11 (5.9)    | 33 (17.8)    | 136 (73.5)       | <b>10 (45.5)</b>                                                            | 7 (31.8)        | 3 (13.6)    | 5 (22.7)     | 7 (31.8)         |
| I had to visit hospital too often                                                                    | <b>12 (6.5)</b>                                                             | 1 (0.5)         | 11 (5.9)    | 39 (21.1)    | 134 (72.4)       | <b>4 (18.2)</b>                                                             | 0               | 4 (18.2)    | 11 (50.0)    | 7 (31.8)         |
| Treatment required injections too many times                                                         | <b>12 (6.5)</b>                                                             | 0               | 12 (6.5)    | 38 (20.5)    | 135 (73.0)       | <b>5 (22.7)</b>                                                             | 0               | 5 (22.7)    | 4 (18.2)     | 13 (59.1)        |
| I was dissatisfied with the doctor                                                                   | <b>10 (5.4)</b>                                                             | 2 (1.1)         | 8 (4.3)     | 29 (15.7)    | 146 (78.9)       | <b>4 (18.2)</b>                                                             | 2 (9.1)         | 2 (9.1)     | 9 (40.9)     | 9 (40.9)         |
| Transport to hospital was inconvenient                                                               | <b>8 (4.3)</b>                                                              | 0               | 8 (4.3)     | 28 (15.1)    | 149 (80.5)       | <b>7 (31.8)</b>                                                             | 1 (4.5)         | 6 (27.3)    | 6 (27.3)     | 9 (40.9)         |
| I had another disease I had to prioritize over AMD                                                   | <b>8 (4.3)</b>                                                              | 2 (1.1)         | 6 (3.2)     | 23 (12.4)    | 154 (83.2)       | <b>3 (13.6)</b>                                                             | 0               | 3 (13.6)    | 4 (18.2)     | 15 (68.2)        |
| I was concerned with side effects                                                                    | <b>7 (3.8)</b>                                                              | 1 (0.5)         | 6 (3.2)     | 37 (20.0)    | 141 (76.2)       | <b>3 (13.6)</b>                                                             | 0               | 3 (13.6)    | 6 (27.3)     | 13 (59.1)        |
| <i>If you were in need of a companion, it was hard to find someone who could take me to hospital</i> | <b>4 (2.2)</b>                                                              | 1 (0.5)         | 3 (1.6)     | 24 (13.0)    | 157 (84.9)       | <b>0</b>                                                                    | 0               | 0           | 7 (31.8)     | 15 (68.2)        |

Values are *n* (%). AMD, age-related macular degeneration.

**Table S5.** Reasons for dissatisfaction with treatment in Cohort 2 ( $n = 65$ ).

|                                                                                                  | <b>True</b><br>(= Definitely true<br>+ Mostly true) | Definitely<br>true | Mostly true | Mostly false | Definitely<br>false |
|--------------------------------------------------------------------------------------------------|-----------------------------------------------------|--------------------|-------------|--------------|---------------------|
| Treatment is time-consuming with long waiting times                                              | <b>50 (76.9)</b>                                    | 20 (30.8)          | 30 (46.2)   | 8 (12.3)     | 7 (10.8)            |
| Financial burden                                                                                 | <b>46 (70.8)</b>                                    | 22 (33.8)          | 24 (36.9)   | 9 (13.8)     | 10 (15.4)           |
| Treatment is ineffective                                                                         | <b>38 (58.5)</b>                                    | 9 (13.8)           | 29 (44.6)   | 20 (30.8)    | 7 (10.8)            |
| Feeling of the injection is unpleasant                                                           | <b>34 (52.3)</b>                                    | 10 (15.4)          | 24 (36.9)   | 25 (38.5)    | 6 (9.2)             |
| I am scared of having an injection in the eye                                                    | <b>33 (50.8)</b>                                    | 9 (13.8)           | 24 (36.9)   | 24 (36.9)    | 8 (12.3)            |
| Injectons are required too often                                                                 | <b>31 (47.7)</b>                                    | 7 (10.8)           | 24 (36.9)   | 24 (36.9)    | 10 (15.4)           |
| I have to visit the hospital too often                                                           | <b>27 (41.5)</b>                                    | 5 (7.7)            | 22 (33.8)   | 27 (41.5)    | 11 (16.9)           |
| Transport to hospital is inconvenient                                                            | <b>22 (33.8)</b>                                    | 4 (6.2)            | 18 (27.7)   | 26 (40.0)    | 17 (26.2)           |
| I am concerned about side effects                                                                | <b>20 (30.8)</b>                                    | 2 (3.1)            | 18 (27.7)   | 27 (41.5)    | 18 (27.7)           |
| It is unclear why I should continue treatment                                                    | <b>19 (29.2)</b>                                    | 4 (6.2)            | 15 (23.1)   | 32 (49.2)    | 14 (21.5)           |
| I have another disease more severe than AMD                                                      | <b>15 (23.1)</b>                                    | 5 (7.7)            | 10 (15.4)   | 22 (33.8)    | 28 (43.1)           |
| I am dissatisfied with the doctor                                                                | <b>12 (18.5)</b>                                    | 0                  | 12 (18.5)   | 29 (44.6)    | 24 (36.9)           |
| <i>If you are in need of a companion, it is hard to find someone who can take me to hospital</i> | <b>9 (13.8)</b>                                     | 3 (4.6)            | 6 (9.2)     | 13 (20.0)    | 43 (66.2)           |

Values are  $n$  (%). AMD, age-related macular degeneration.
